# Supplementary material
Source: PubMed Central journal article supplement (PMC1261503)

Figure O-1: AR prevalence by birth quarter and centre.

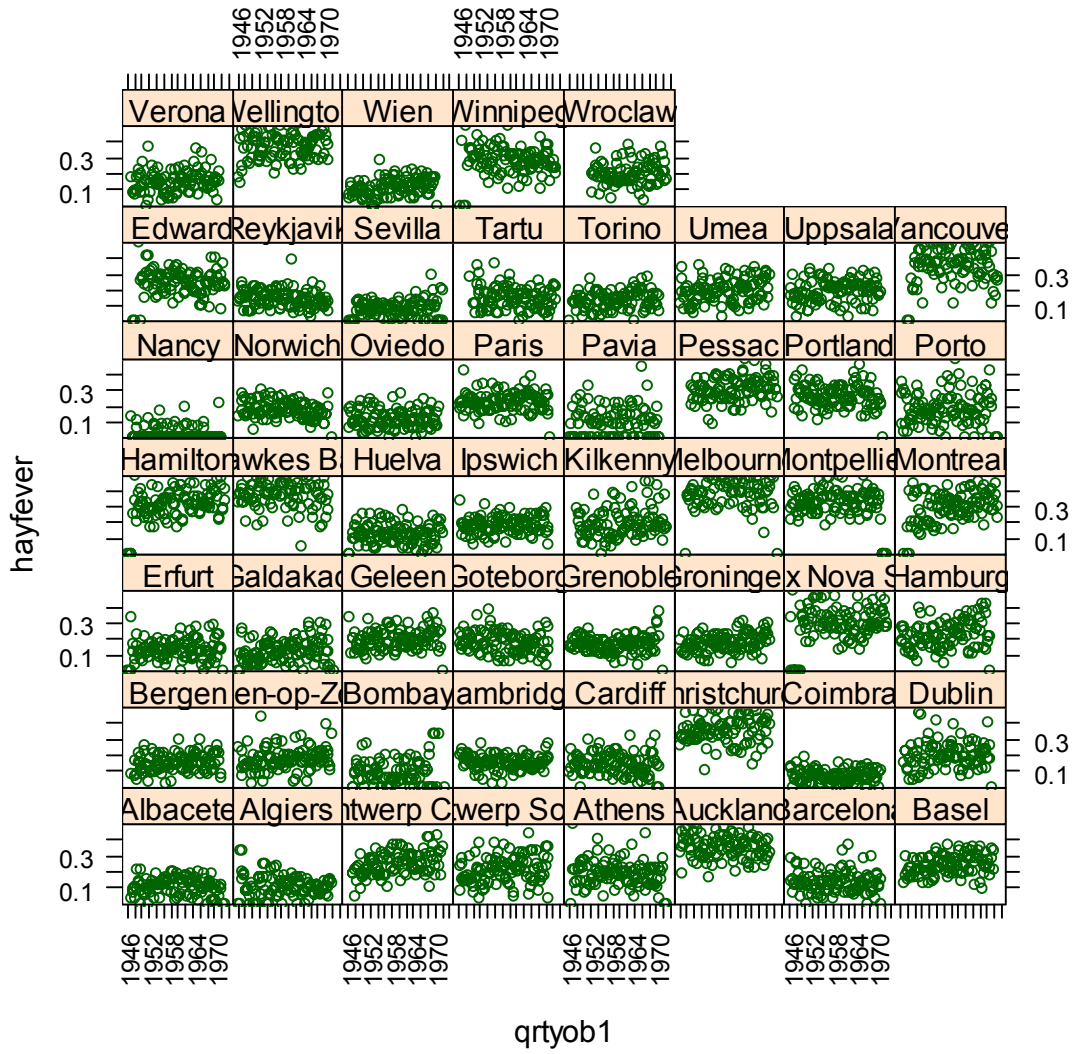

Supplement: pmed.0020294.sg001.pdf [file pmed.0020294.sg001.pdf]

Figure O-2: AR prevalence by birth quarter and latitude/longitude.

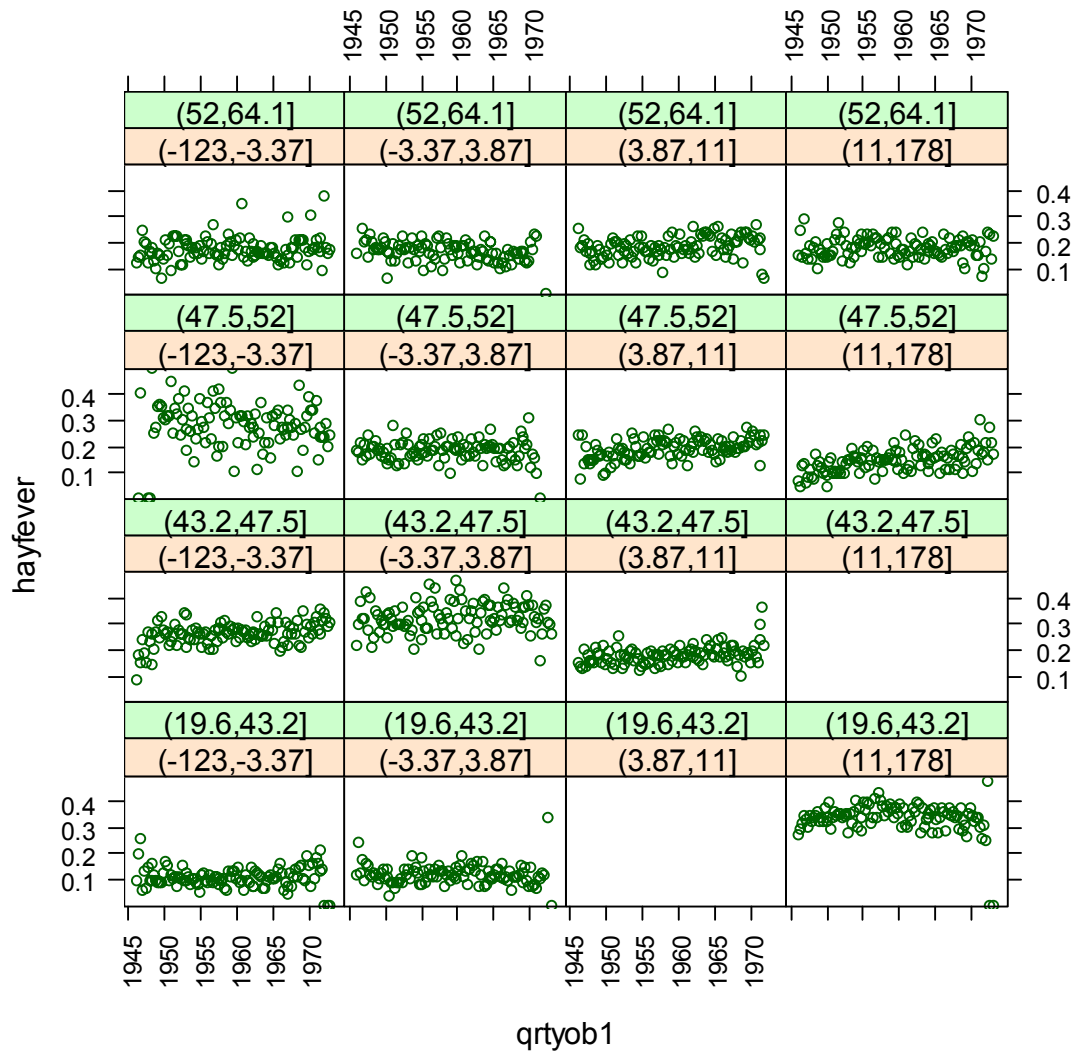

Supplement: pmed.0020294.sg002.pdf [file pmed.0020294.sg002.pdf]

Figure O-2: AR prevalence by birth quarter and latitude/longitude.

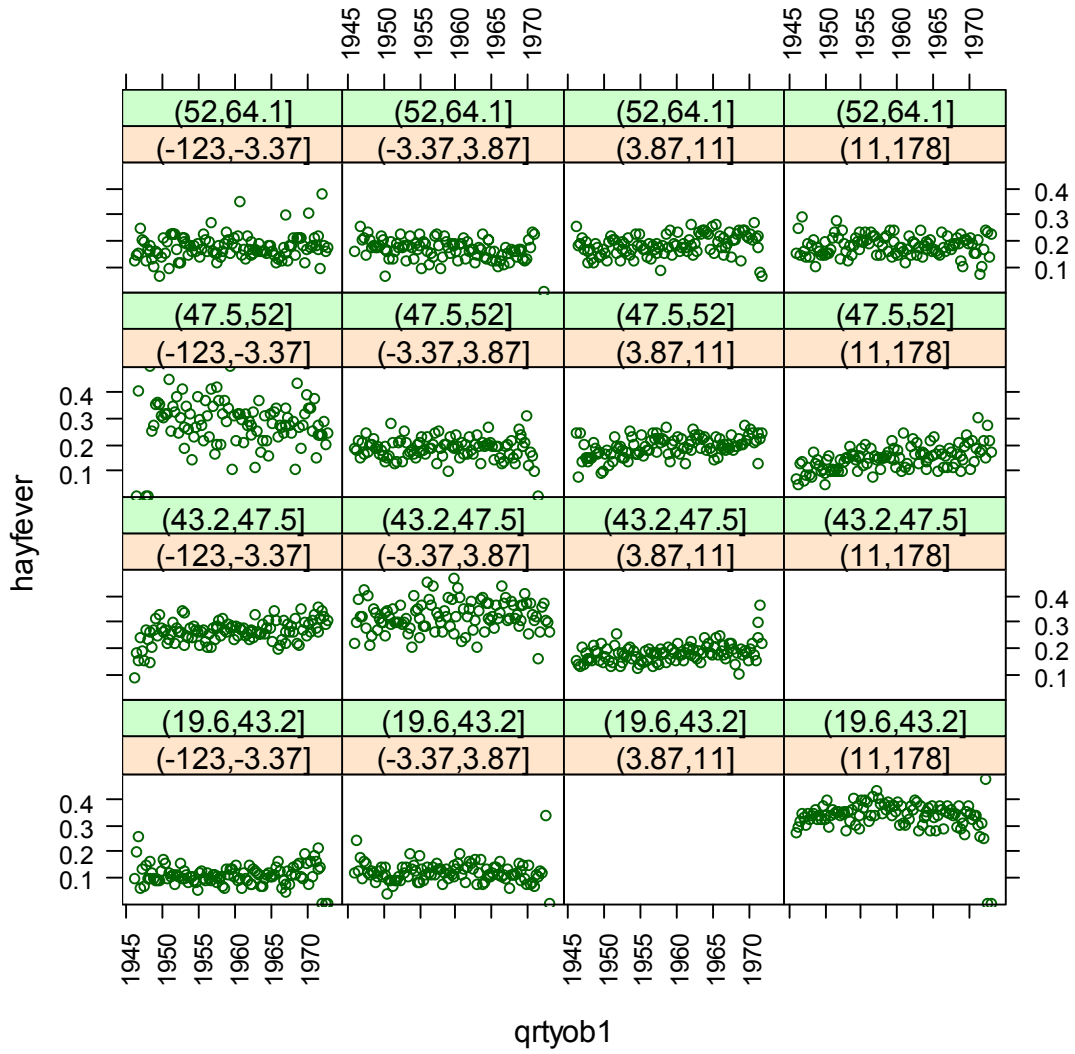

Supplement: pmed.0020294.sg003.pdf [file pmed.0020294.sg003.pdf]

Figure O-4: AR prevalence by birth quarter and sex.

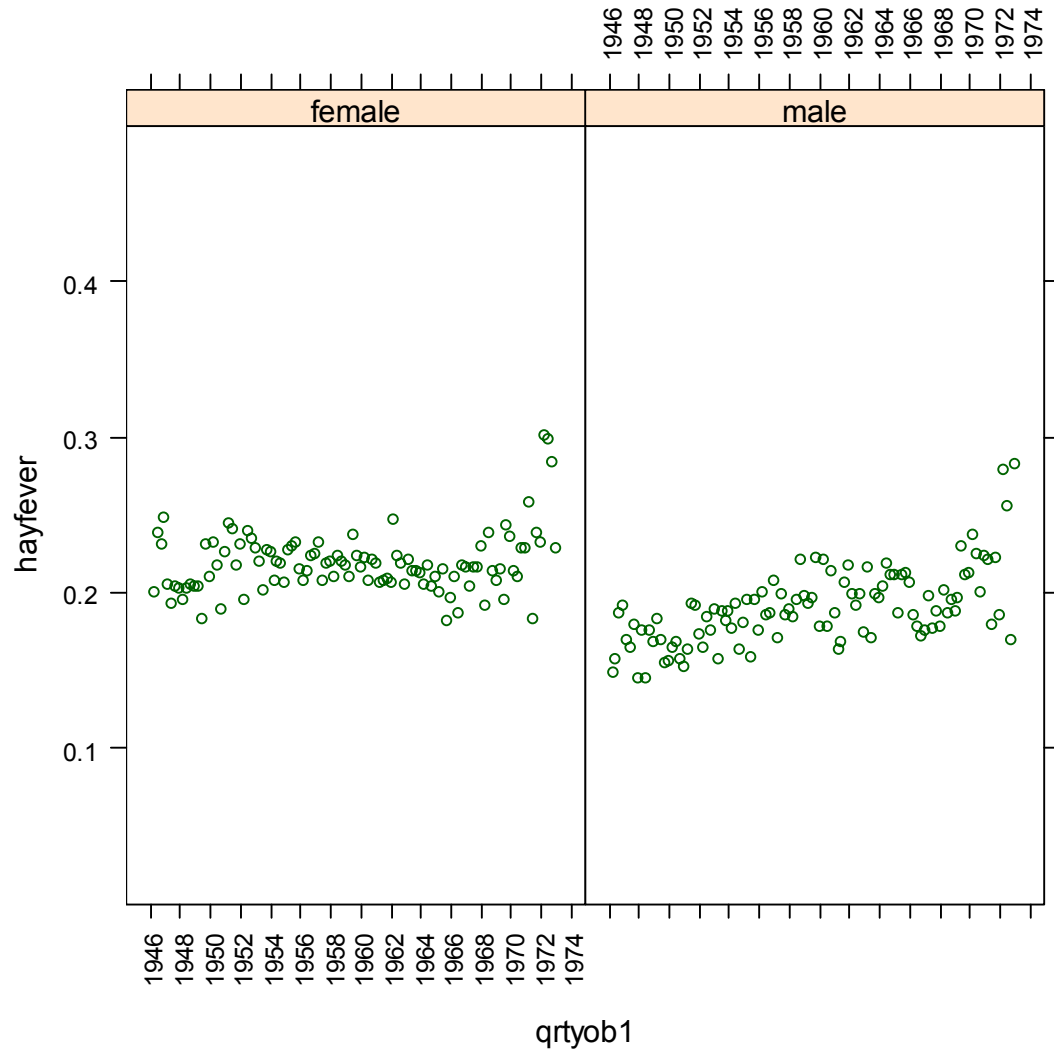

Supplement: pmed.0020294.sg004.pdf [file pmed.0020294.sg004.pdf]

Figure O-5: AR prevalence by month of birth and centre.

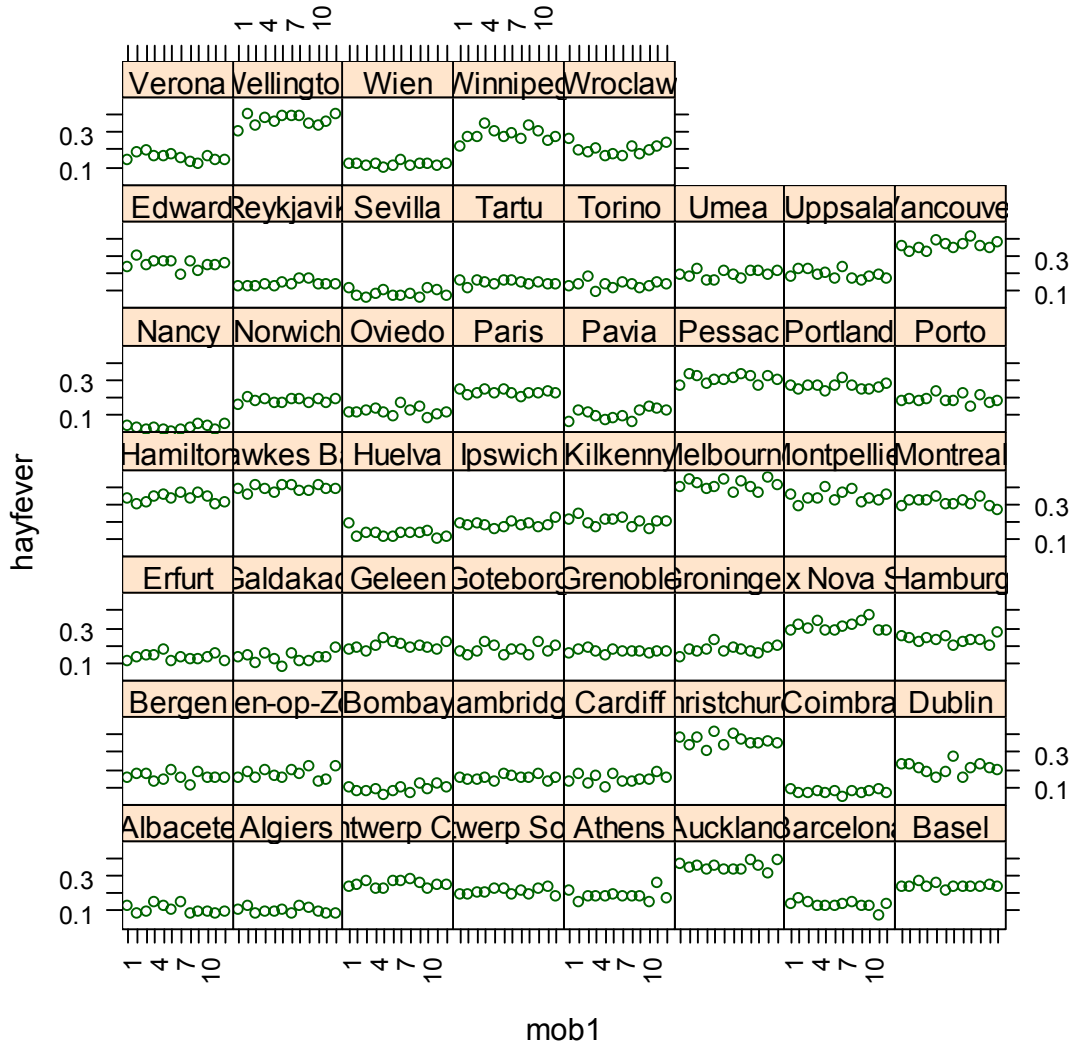

Supplement: pmed.0020294.sg005.pdf [file pmed.0020294.sg005.pdf]

Figure O-6: AR prevalence by month of birth and latitude/longitude.

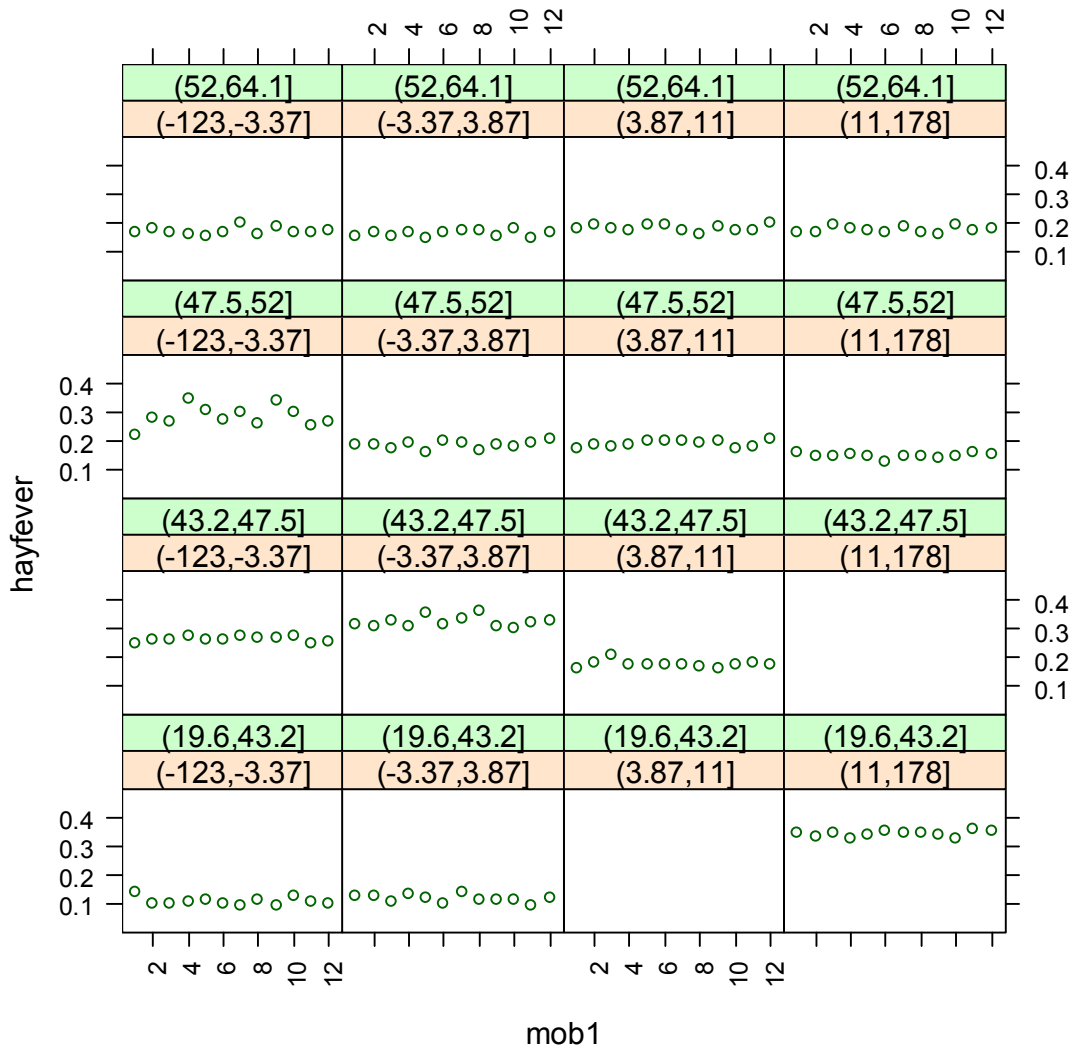

Supplement: pmed.0020294.sg006.pdf [file pmed.0020294.sg006.pdf]

Figure O-7: AR prevalence by month of birth and language.

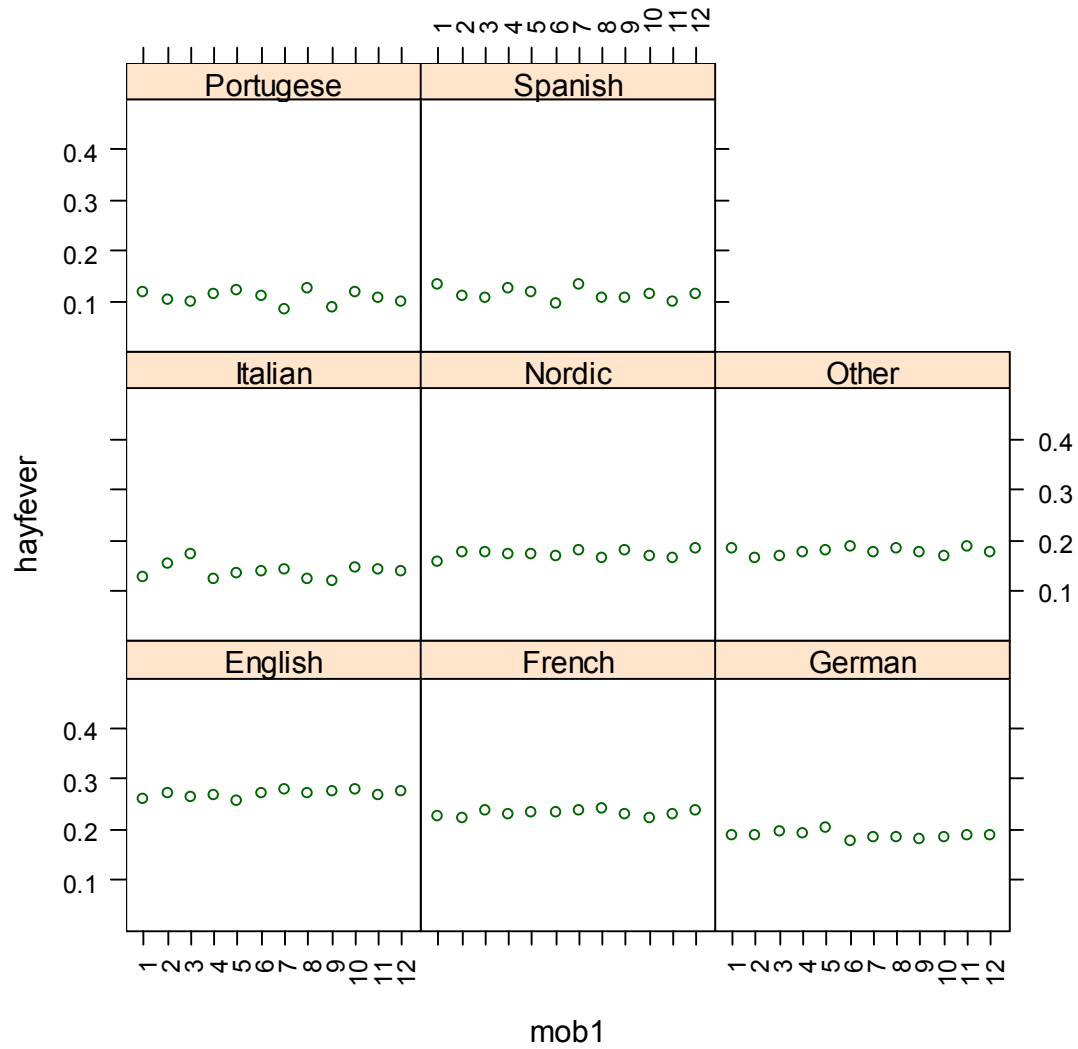

Supplement: pmed.0020294.sg007.pdf [file pmed.0020294.sg007.pdf]

Figure O-8: AR prevalence by month of birth and sex.

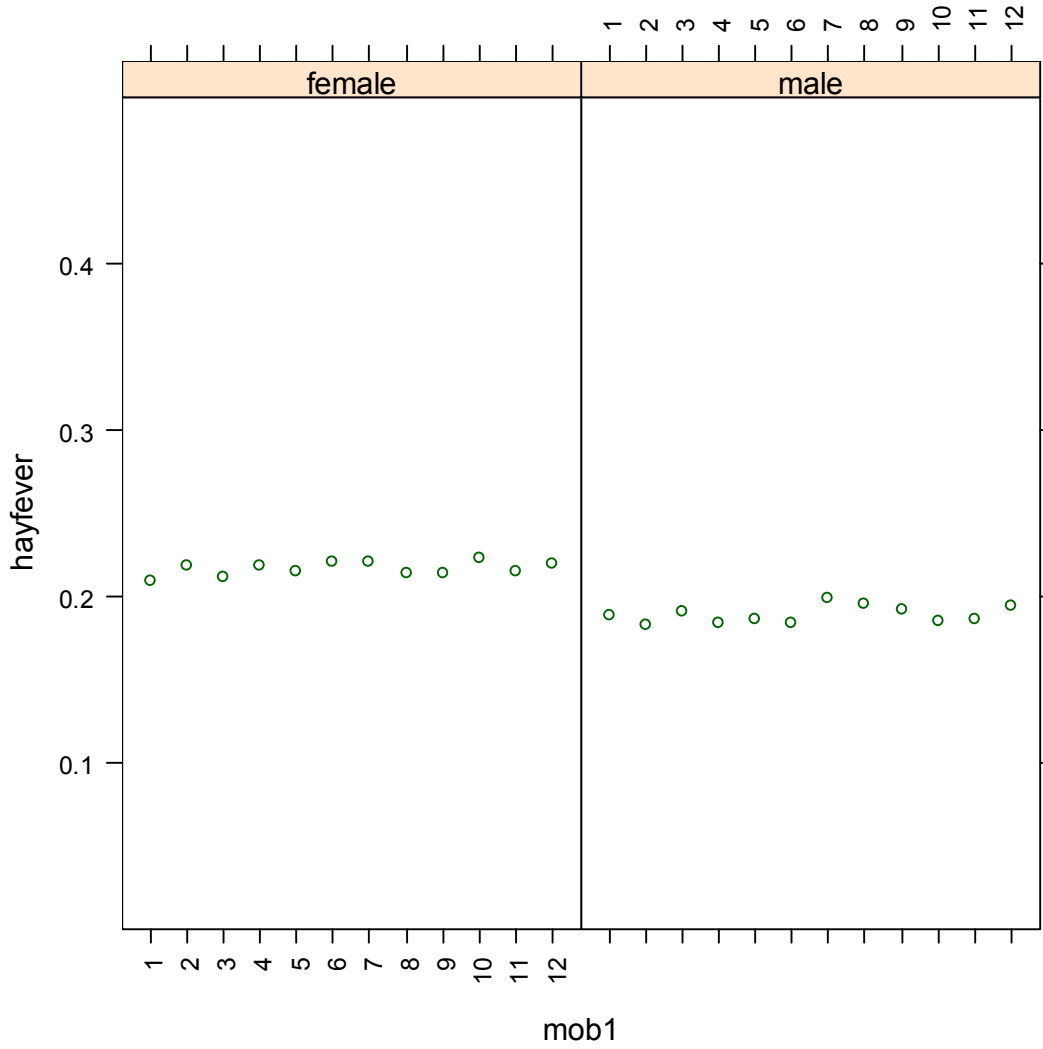

Supplement: pmed.0020294.sg008.pdf [file pmed.0020294.sg008.pdf]

Figure O-9: AR prevalence by month and year of birth.

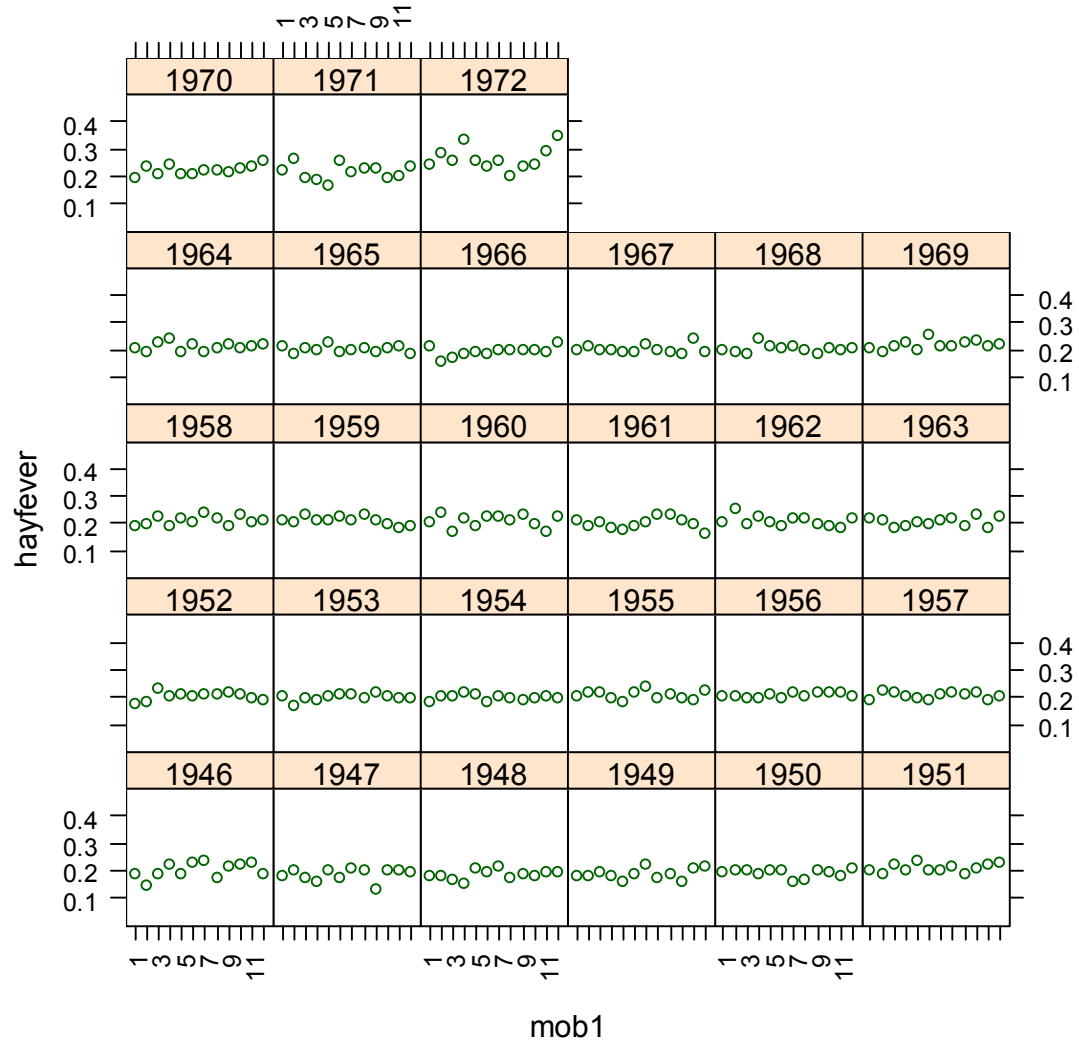

Supplement: pmed.0020294.sg009.pdf [file pmed.0020294.sg009.pdf]

Figure O-10: AR prevalence by quarter and month of birth

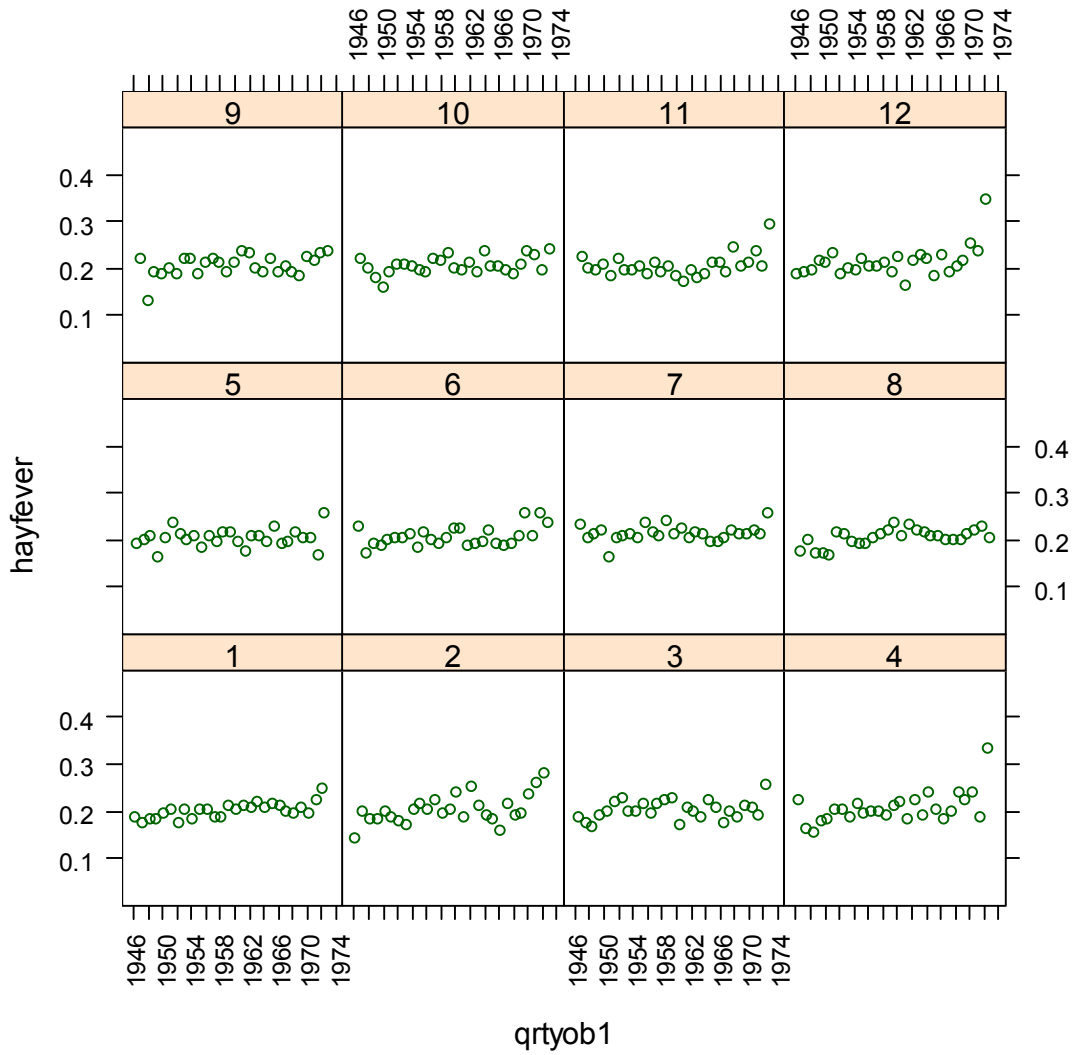

Supplement: pmed.0020294.sg010.pdf [file pmed.0020294.sg010.pdf]

Figure O-11: AR prevalence by absolute latitude and language

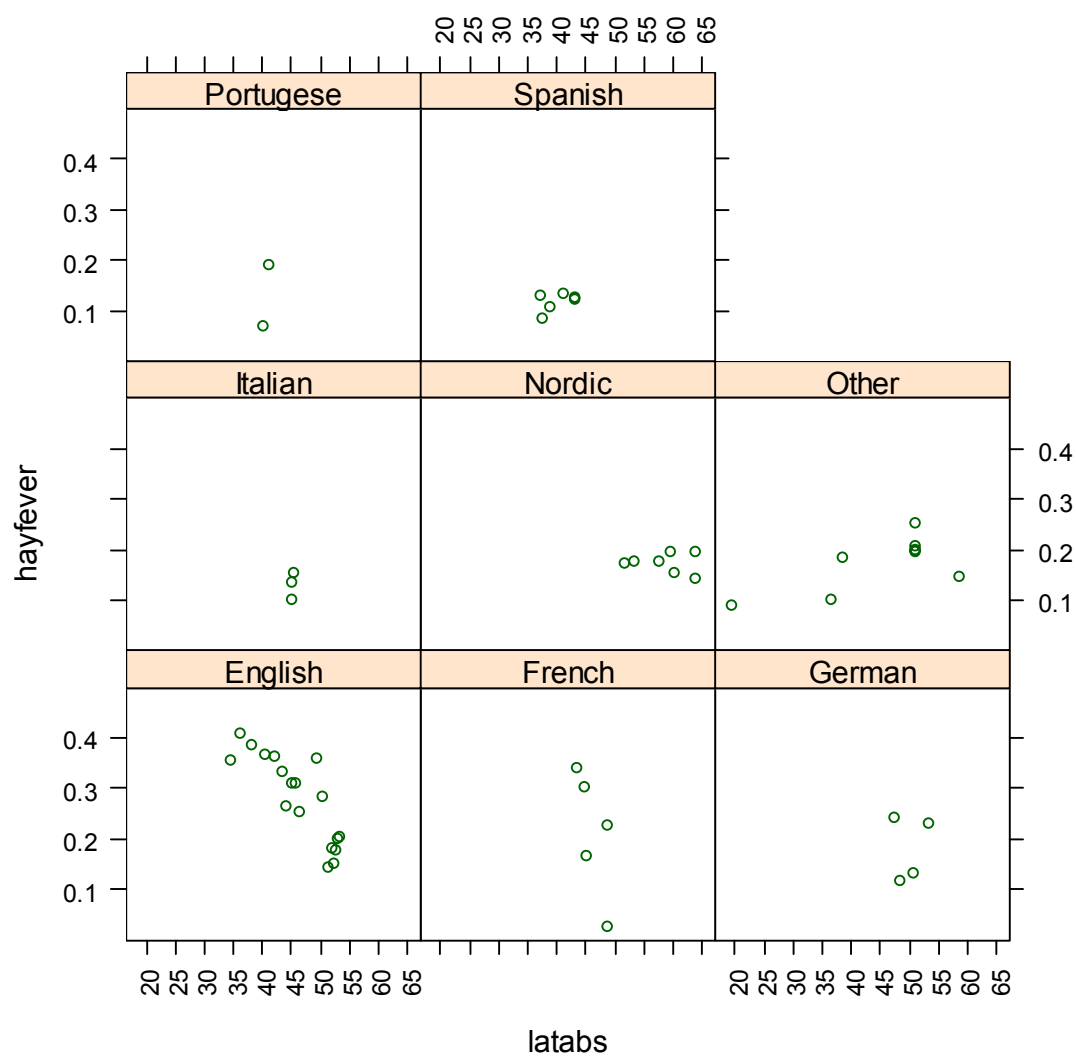

Supplement: pmed.0020294.sg011.pdf [file pmed.0020294.sg011.pdf]

Figure O-12: Median log total IgE by birth quarter and centre.

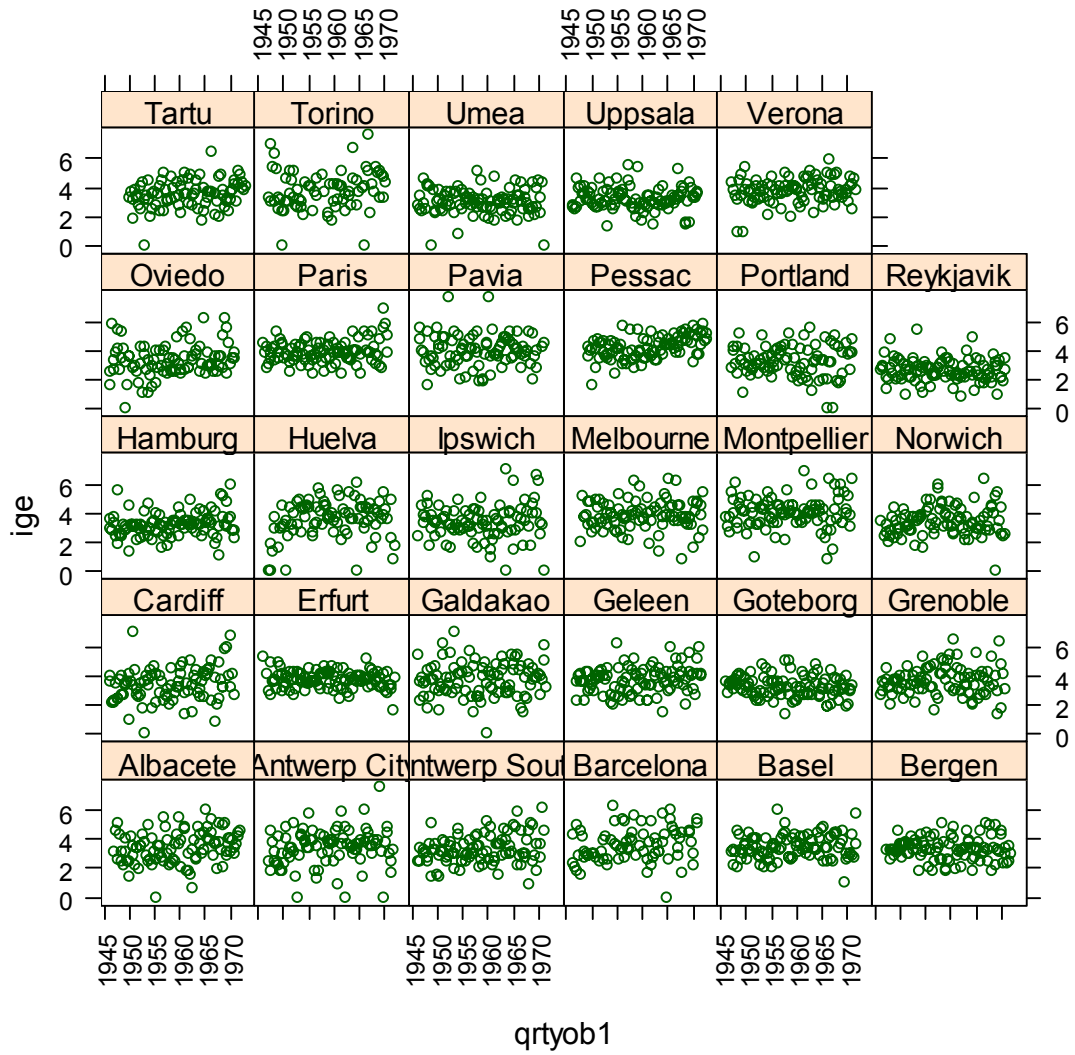

Supplement: pmed.0020294.sg012.pdf [file pmed.0020294.sg012.pdf]

Figure O-13: Median log total IgE by birth quarter and latitude/longitude.

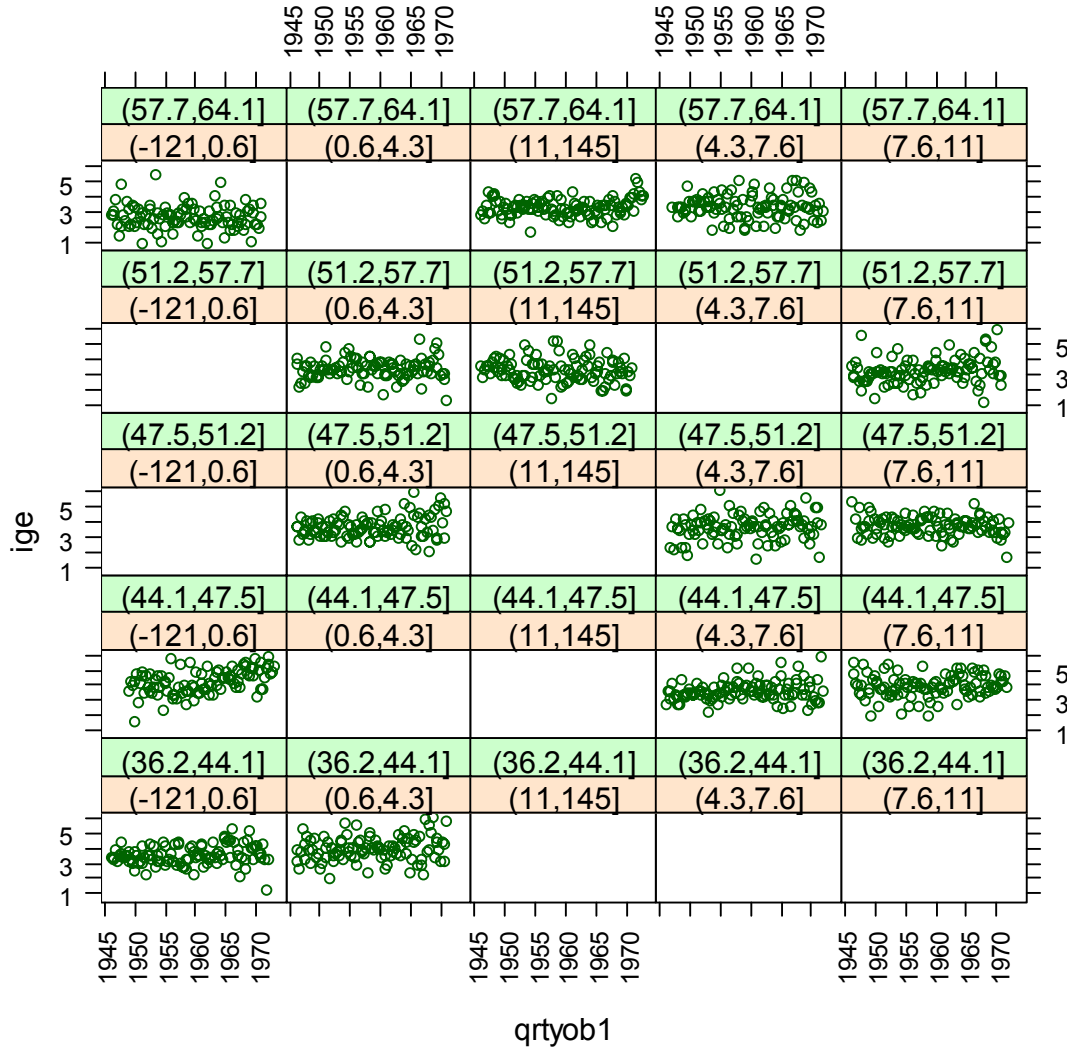

Supplement: pmed.0020294.sg013.pdf [file pmed.0020294.sg013.pdf]

Figure O-14: Median log total IgE by birth quarter and language.

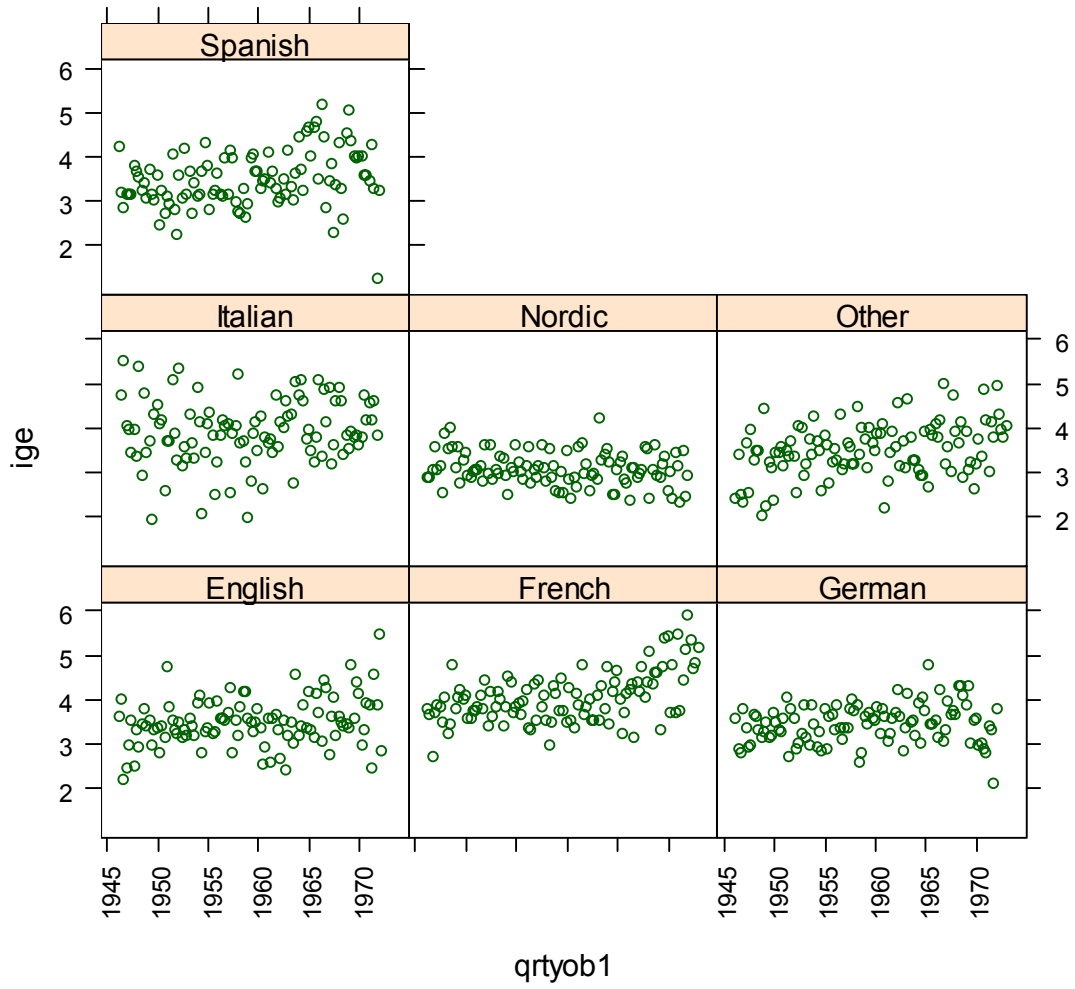

Supplement: pmed.0020294.sg014.pdf [file pmed.0020294.sg014.pdf]

Figure O-15: Median log total IgE by birth quarter and sex.

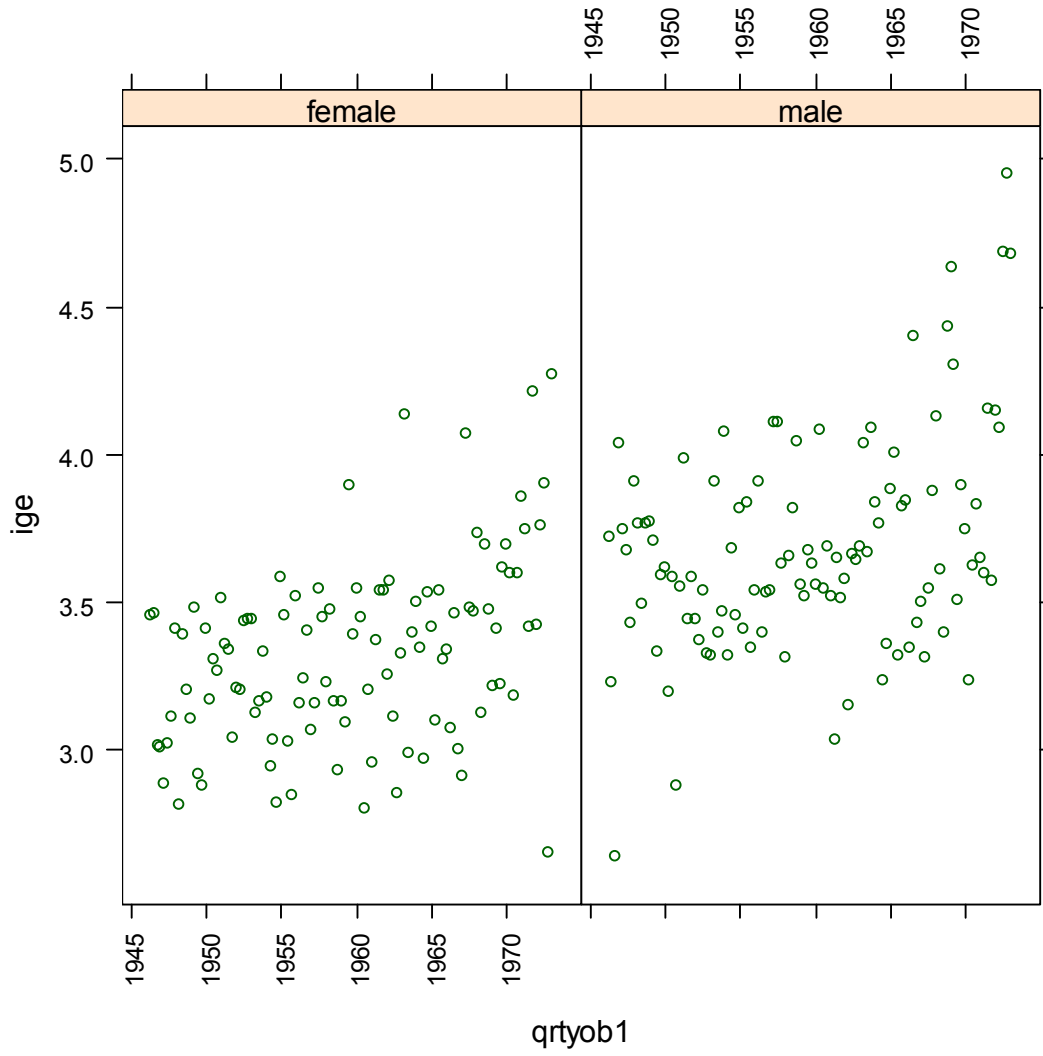

Supplement: pmed.0020294.sg015.pdf [file pmed.0020294.sg015.pdf]

Figure O-16: Median log total IgE by month of birth and centre.

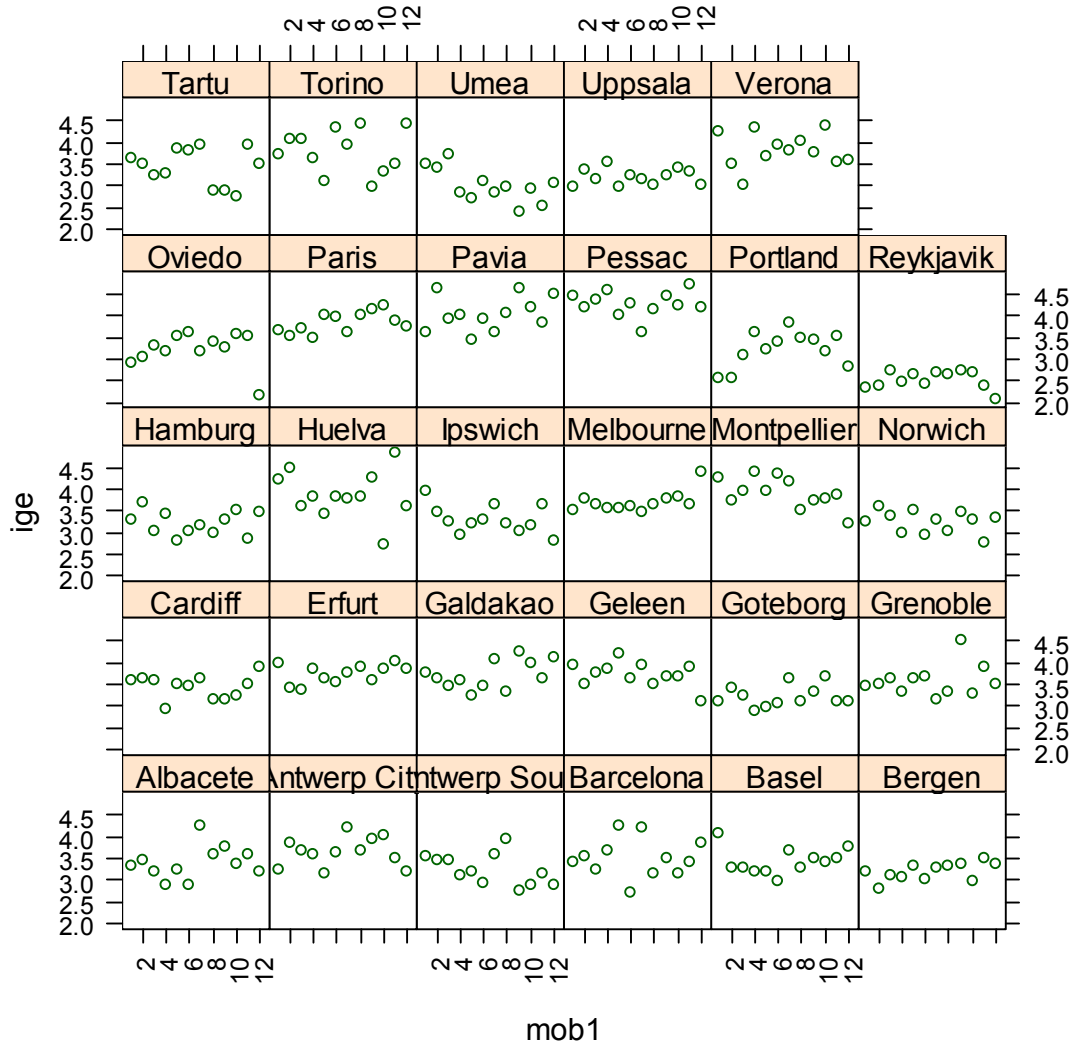

Supplement: pmed.0020294.sg016.pdf [file pmed.0020294.sg016.pdf]

Figure O-17: Median log total IgE by month of birth and latitude/longitude.

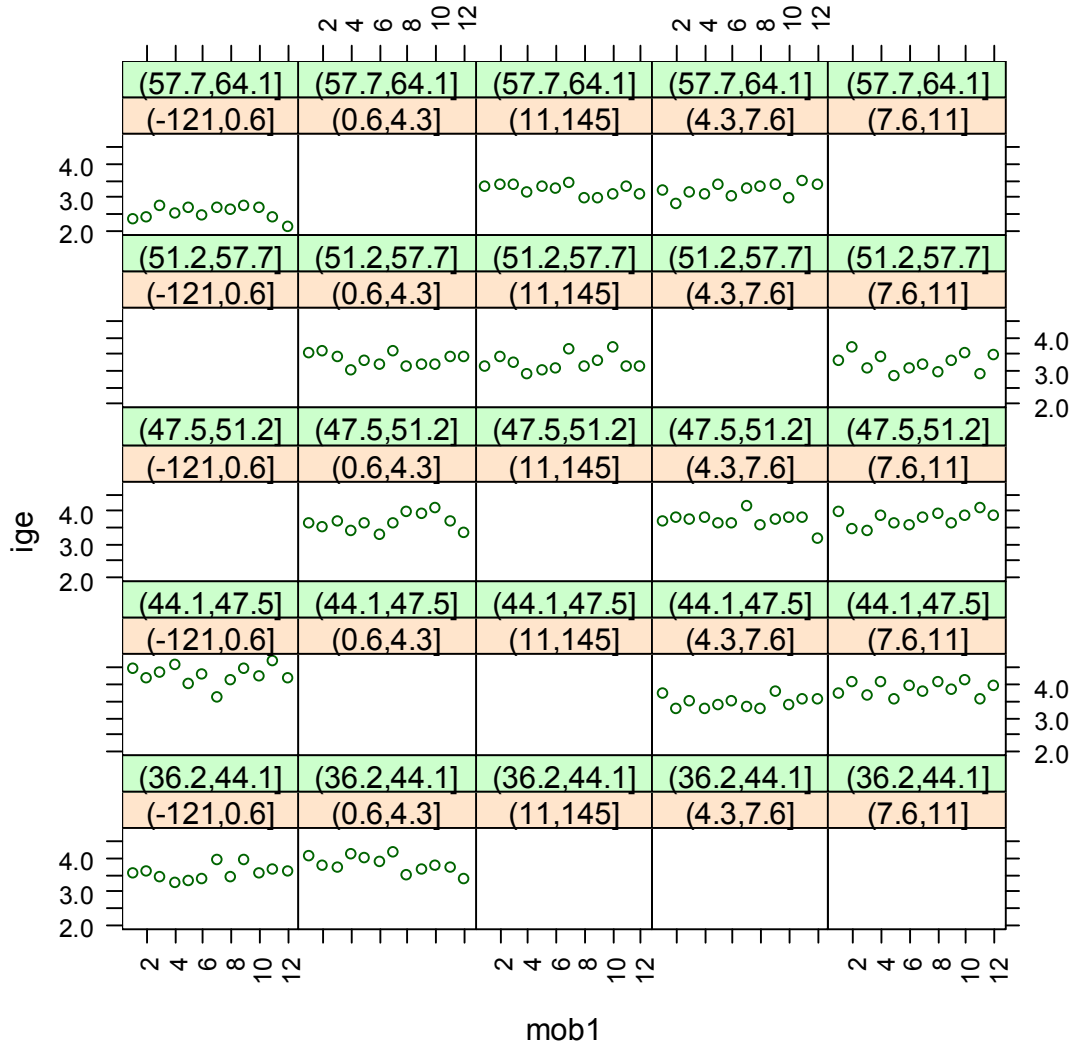

Supplement: pmed.0020294.sg017.pdf [file pmed.0020294.sg017.pdf]

Figure O-18: Median log total IgE by month of birth and language.

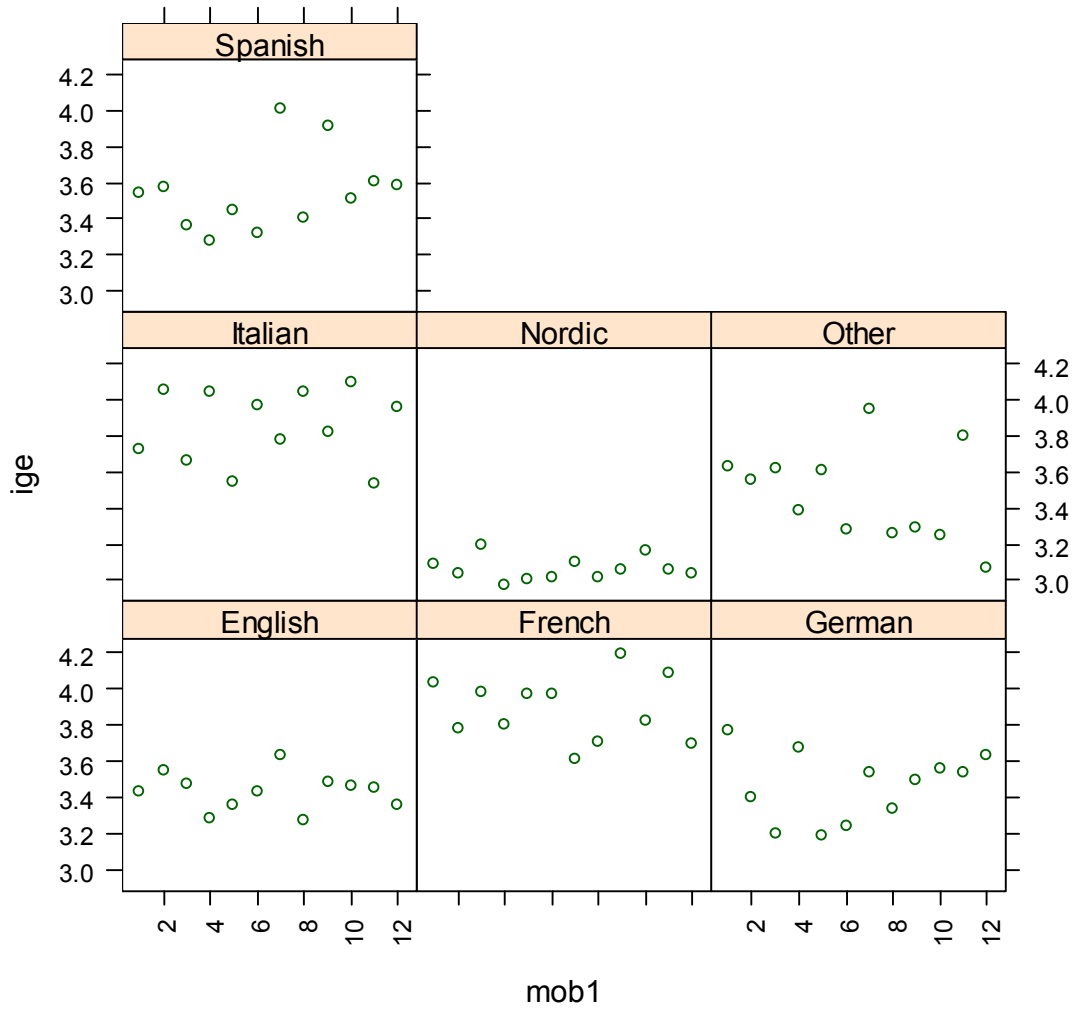

Supplement: pmed.0020294.sg018.pdf [file pmed.0020294.sg018.pdf]

Figure O-19: Median log total IgE by month of birth and sex.

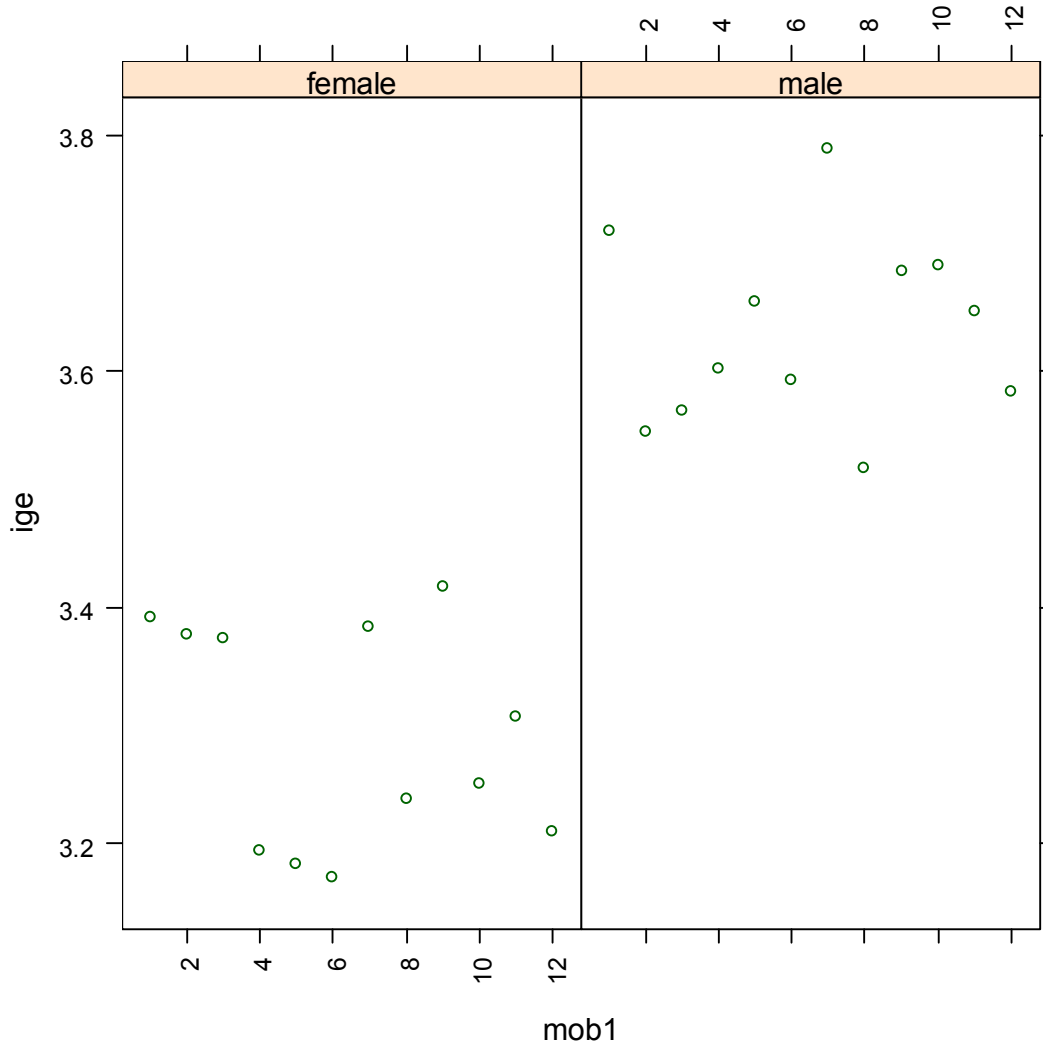

Supplement: pmed.0020294.sg019.pdf [file pmed.0020294.sg019.pdf]

Figure O-20: Median log total IgE by month and year of birth.

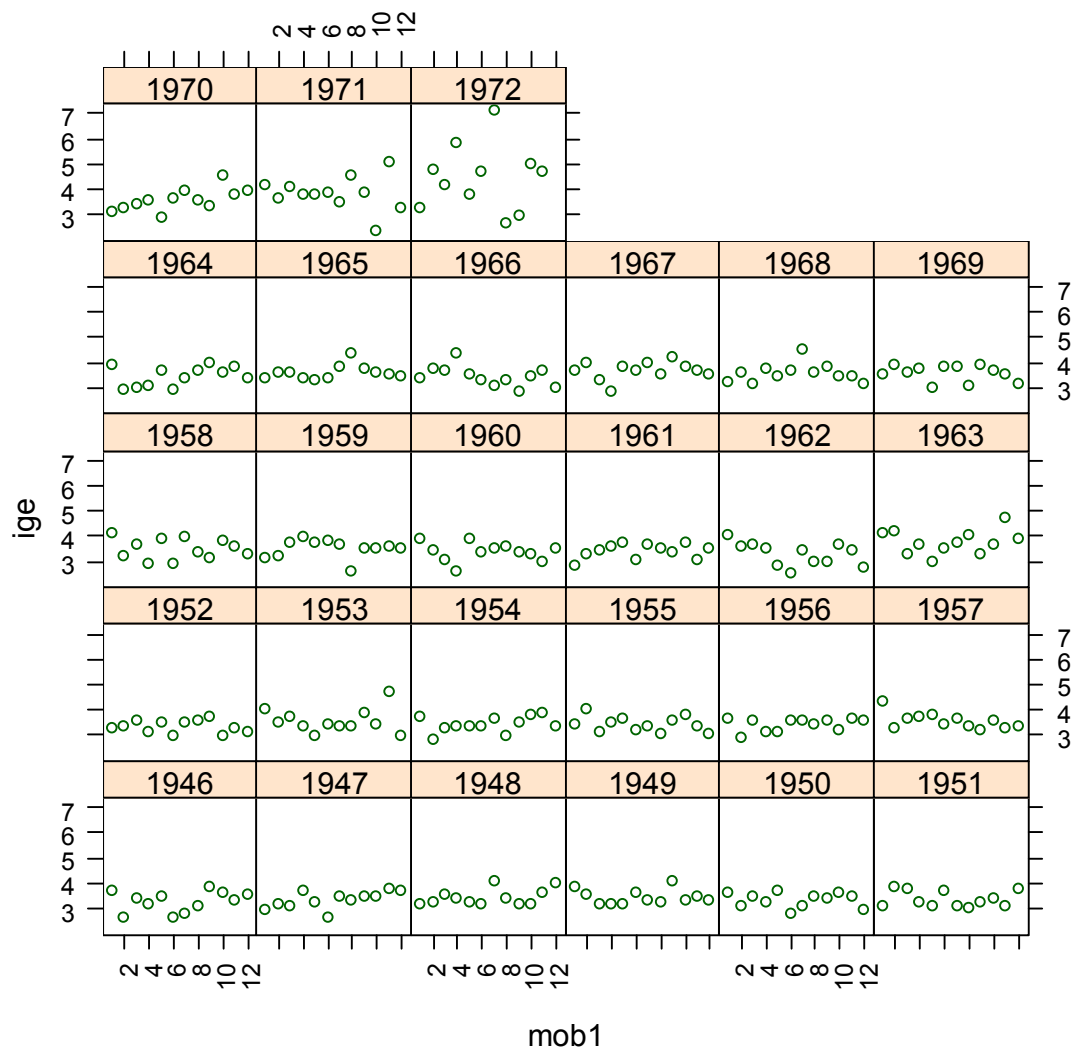

Supplement: pmed.0020294.sg020.pdf [file pmed.0020294.sg020.pdf]

Figure O-21: Median log total IgE by quarter and month of birth.

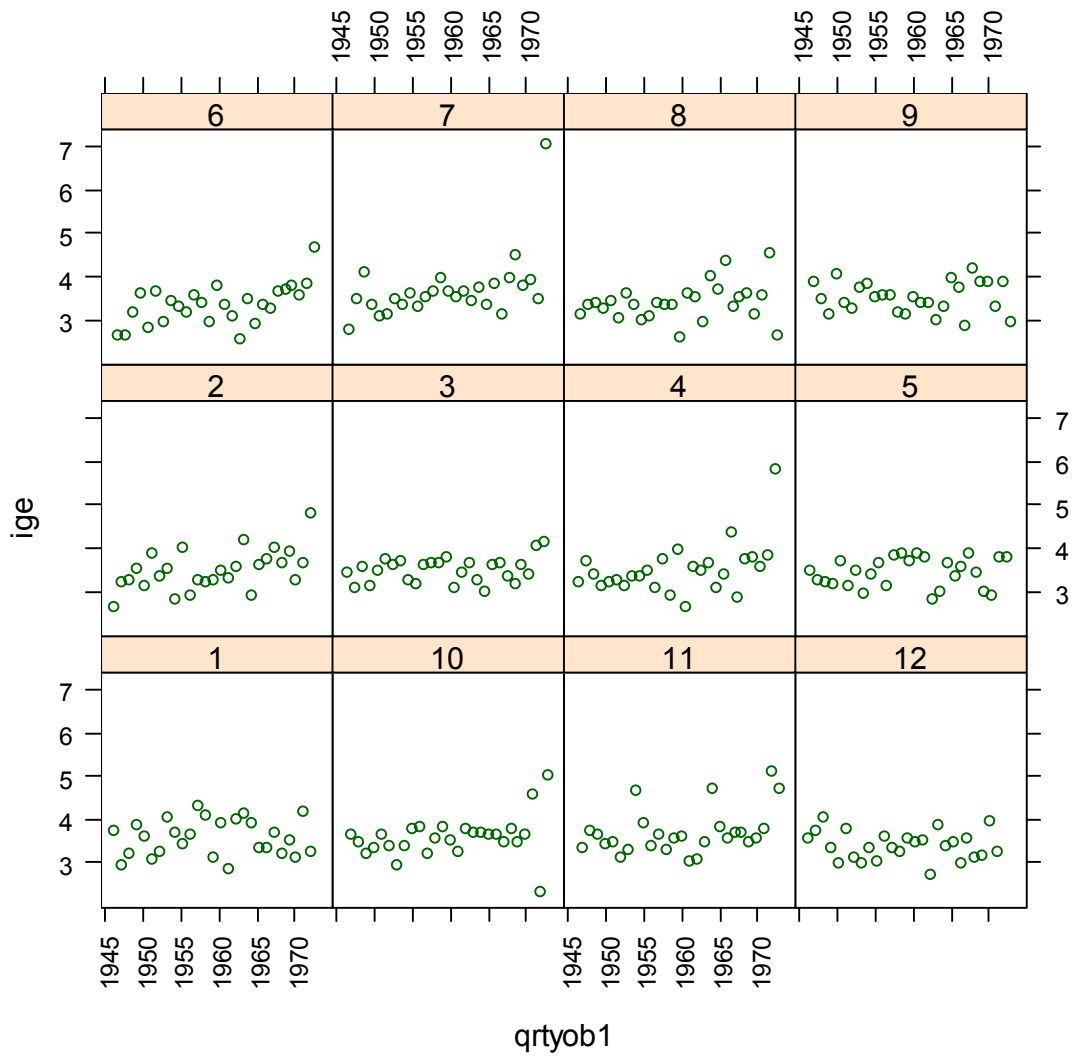

Supplement: pmed.0020294.sg021.pdf [file pmed.0020294.sg021.pdf]

Figure O-22: Median log total IgE by absolute latitude and language.

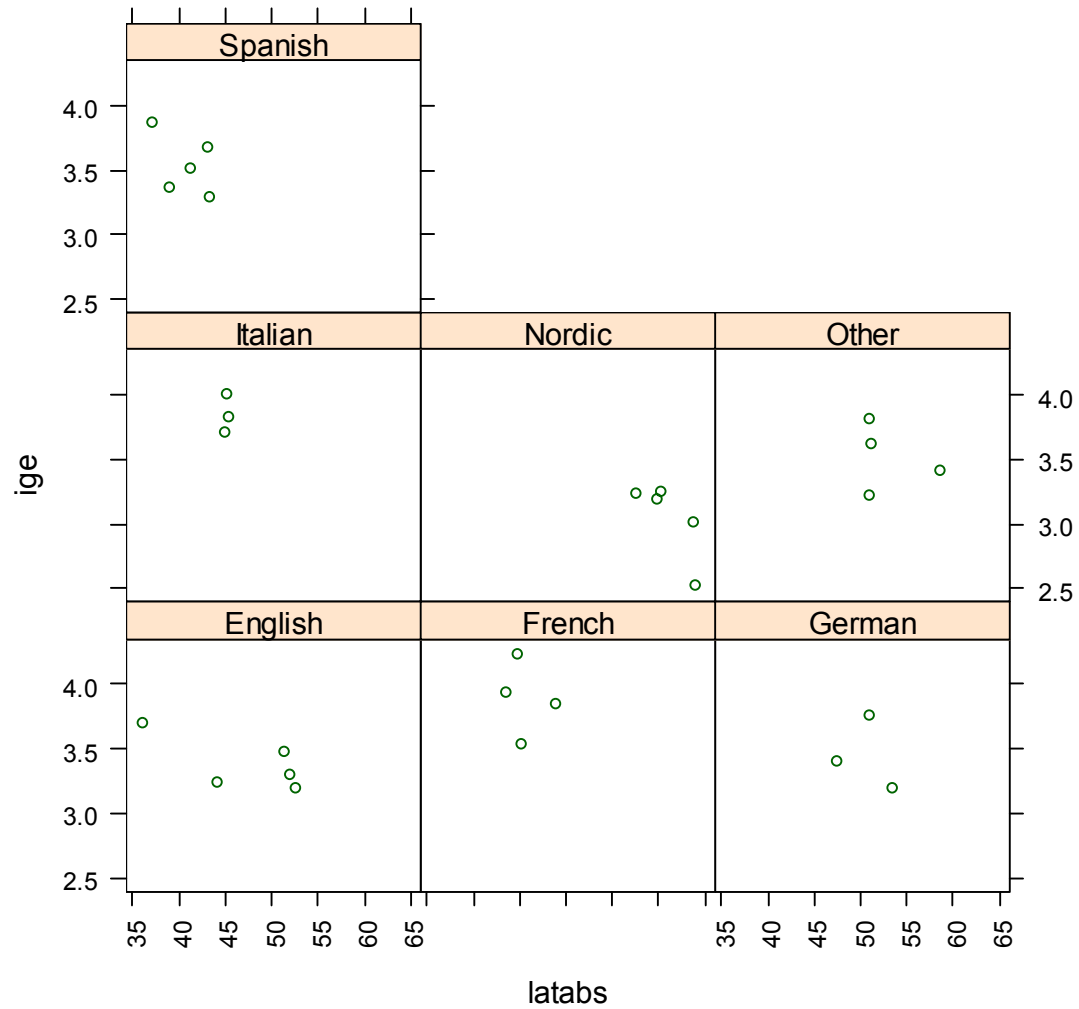

Supplement: pmed.0020294.sg022.pdf [file pmed.0020294.sg022.pdf]
